# Supplementary material for: Isolation, Characterization, and Biopreservation of Lactobacillus brevis DN-1 to Inhibit Mold and Remove Aflatoxin B1 in Peanut and Sunflower Cakes
Source: MDPI journal article supplement (doi:10.3390/agriculture14050698), 2024-04-29
Supplement: s1 [file s1]

# supplementary material

## 1. Supplementary Tables

**Table S1:** Physiological and biochemical test results of stain DN-1.

| Experimental Projects                          | Results | Experimental Projects | Results | Experimental Projects | Results |
|------------------------------------------------|---------|-----------------------|---------|-----------------------|---------|
| Catalase from <i>Micrococcus lysodeikticus</i> | -       | Sucrose               | +       | Fibrous disaccharides | +       |
| Hydrogen sulfide production                    | -       | xylose                | W       | raffinose             | -       |
| Gelatin liquefaction                           | -       | Maltose               | +       | arabinose             | +       |
| Indole production                              | -       | trehalose             | -       | rhamnose              | -       |
| Nitrate reduction                              | -       | mannose               | W       | sorbitol              | -       |
| Glucose                                        | +       | Sorbitol              | -       | Hesperidin            | +       |

+ indicates a positive reaction, - indicates a negative reaction, and W indicates a weak positive reaction.
